# Supplementary material
Source: PubMed Central journal article supplement (PMC3180873)

## Supplementary Information

# Synthesis and Immunological Properties of *N*-Modified GM3 Antigens as Therapeutic Cancer Vaccines

Yanbin Pan,<sup>†</sup> Peter Chefalo,<sup>‡</sup> Nancy Nagy,<sup>‡</sup> Clifford Harding,<sup>‡\*</sup> and Zhongwu Guo<sup>†\*</sup>

Departments of Chemistry and Pathology, Case Western Reserve University,  
Cleveland, Ohio 44106, USA

### Additional Experimental Procedures

**General Methods.** NMR spectra were recorded on a 300 or 600 MHz NMR spectrometer with chemical shifts reported in ppm ( $\delta$ ) relative to Me<sub>4</sub>Si (<sup>1</sup>H), CDCl<sub>3</sub> (<sup>13</sup>C) and CFCl<sub>3</sub> (<sup>19</sup>F), respectively. Coupling constants (*J*) are reported in hertz (Hz). Thin layer chromatography (TLC) was performed on silica gel 60 GF<sub>256</sub> with the detection by charring with phosphomolibdic acid in EtOH or 5% H<sub>2</sub>SO<sub>4</sub> in EtOH. Commercial solvents and reagents were directly used without further purification.

***O*-(2,6-di-*O*-Acetyl- $\beta$ -D-galactopyranosyl)-(1 $\rightarrow$ 4)-2,3,6-tri-*O*-acetyl- $\beta$ -D-glucopyranosyl Azide (5).** It was prepared as a white solid from lactose (4) in six steps and a 56% overall yield according a reported procedure [Xue, J., Pan, Y., and Guo, Z. (2002). *Tetrahedron Lett.* 43, 1599-1602]. **5:** R<sub>f</sub> 0.46 (DCM and MeOH, 16:1); [ $\alpha$ ]<sub>D</sub> -14 (*c* 1.0, CHCl<sub>3</sub>); <sup>1</sup>H NMR (CDCl<sub>3</sub>, 600 MHz):  $\delta$  5.18 (dd, 1 H, *J* 9.0, 9.0 Hz, H-3), 4.87 (dd, 1 H, *J* 9.6, 8.4 Hz, H-2'), 4.86 (dd, 1 H, *J* 9.6, 7.8 Hz, H-2), 4.61 (d, 1 H, *J* 9.0 Hz, H-1'), 4.50 (dd, 1 H, *J* 12.0, 1.8 Hz, H-6'), 4.34 (d, 1 H, *J* 7.8 Hz, H-1), 4.35 (dd, 1 H, *J* 11.4, 6.0 Hz, H-6), 4.22 (dd, *J* 11.4, 6.6 Hz, H-6), 4.17 (dd, 1 H, *J* 12.0, 3.6 Hz, H-6'), 3.85 (bs, 1 H, H-4'), 3.76 (dd, 1 H, *J* 9.0, 9.6 Hz, H-4), 3.72 (m, 1 H, H-5), 3.62 (dd, 1 H, *J* 6.6, 6.6 Hz, H-5'), 3.59

(m, 1 H, H-3'), 3.42 (d, 1 H,  $J$  7.4 Hz, OH), 3.32 (d, 1 H,  $J$  4.8 Hz, OH), 2.12, 2.11, 2.10, 2.07, 2.04 (5 s,  $5 \times 3\text{H}$ , Ac).  $^{13}\text{C}$  NMR ( $\text{CDCl}_3$ , 50M Hz):  $\delta$  171.4, 171.0, 170.5, 170.4, 169.5, 100.9, 87.8, 75.9, 75.0, 73.5, 72.7, 72.5, 72.4, 70.8, 68.5, 62.4, 62.0, 20.9, 20.8, 20.8, 20.8, 20.6; FABMS: calcd for  $\text{C}_{26}\text{H}_{43}\text{N}_4\text{O}_{17}$   $[\text{M} + \text{DEA} + \text{H}]^+$  (DEA: diethanolamine, the matrix) 683.2623, found 683.2613.

**Methyl (Ethyl 4,7,8,9-Tetra-*O*-acetyl-3,5-dideoxy-2-thio-5-trifluoroacetamido-*D*-glycero- $\alpha$ -*D*-galacto-non-2-ulopyranosid)onate (8).** After a solution of **7** (7.4g, 13.6 mmol) and MsOH (5 mL) in anhydrous MeOH (50 mL) was refluxed for 24 h,  $\text{Et}_3\text{N}$  was added to neutralize the reaction to pH 8. It was concentrated under reduced pressure. The residue was redissolved in methanol (30 mL), and to the solution was added methyl trifluoroacetate (3.0 mL) at 0 °C. The solution was stirred at rt overnight and concentrated. The residue was dissolved in pyridine (30 mL) and acetic anhydride (15 mL) and stirred at rt overnight. After concentration in a vacuum, the product was purified by column chromatography to afford **8** (6.8 g, 84%;  $\alpha:\beta = 1:5$ ) as a white crystalline product. A part of the  $\beta$ -isomer could be isolated in the pure form. **8 $\beta$** :  $[\alpha]_{\text{D}} -57.1$  (c 1.2,  $\text{CHCl}_3$ );  $^1\text{H}$  NMR ( $\text{CDCl}_3$ , 300MHz):  $\delta$  7.54 (d, 1 H,  $J$  10.0 Hz, NH), 5.39 (m, 2 H,  $J$  2.8, 6.8, 4.9 Hz, H-4,7), 5.07 (m, 1 H,  $J$  2.5, 2.7, 8.4 Hz, H-8), 4.80 (dd, 1 H,  $J$  12.4, 2.2 Hz, H-9a), 4.55 (dd, 1H,  $J$  10.4, 2.3 Hz, H-6), 4.17 (dd, 1 H,  $J$  12.4, 8.2 Hz, H-9b), 4.05 (dd, 1H,  $J$  11.5, 10.4 Hz, H-5), 3.78 (s, 3 H,  $\text{OCH}_3$ ), 2.45-2.61 (m, 3 H, H-3e,  $\text{SCH}_2\text{CH}_3$ ), 2.11, 2.07, 2.02, 2.00 (4s,  $4 \times 3$  H), 1.17 (t, 3 H,  $J$  7.5 Hz,  $\text{SCH}_2\text{CH}_3$ );  $^{19}\text{F}$  NMR ( $\text{CDCl}_3$ ):  $\delta$  -76.8 (s);  $^{13}\text{C}$  NMR ( $\text{CDCl}_3$ , 50M Hz):  $\delta$  171.5, 171.2, 170.6, 169.9, 168.3, 158.1, 115.6, 85.0, 72.9, 71.2, 68.8, 68.4, 62.4, 52.9, 50.2, 37.3, 22.8, 21.0, 20.7, 20.6, 20.5, 14.0; HR-FABMS: calcd for  $\text{C}_{22}\text{H}_{31}\text{F}_3\text{NO}_{12}\text{S}$   $[\text{M} + \text{H}]^+$  590.1519, found 590.1541.

## Selected NMR and MS Spectra



File Name : c:\mswin\data\046001.mss  
 Creation Date/Time : 10/29/02 at 12:29:59  
 File Type : Lo-Res Mass Data (Centroid)  
 File Title : 0460 Yanbin Pan #1 LR FAB mag (1200) 10/29/02  
 Description 1 : 2ul sample (in 20ul acetone) & 3ul NBA. Both slits on  
 Description 2 : position #3, filter = 100 Hz, set R = 2000.

SCAN GRAPH. Flagging=M/z.

Int. Scan 2-0:28 to 10-2:24. Entries=204. 100% Int.=215445.

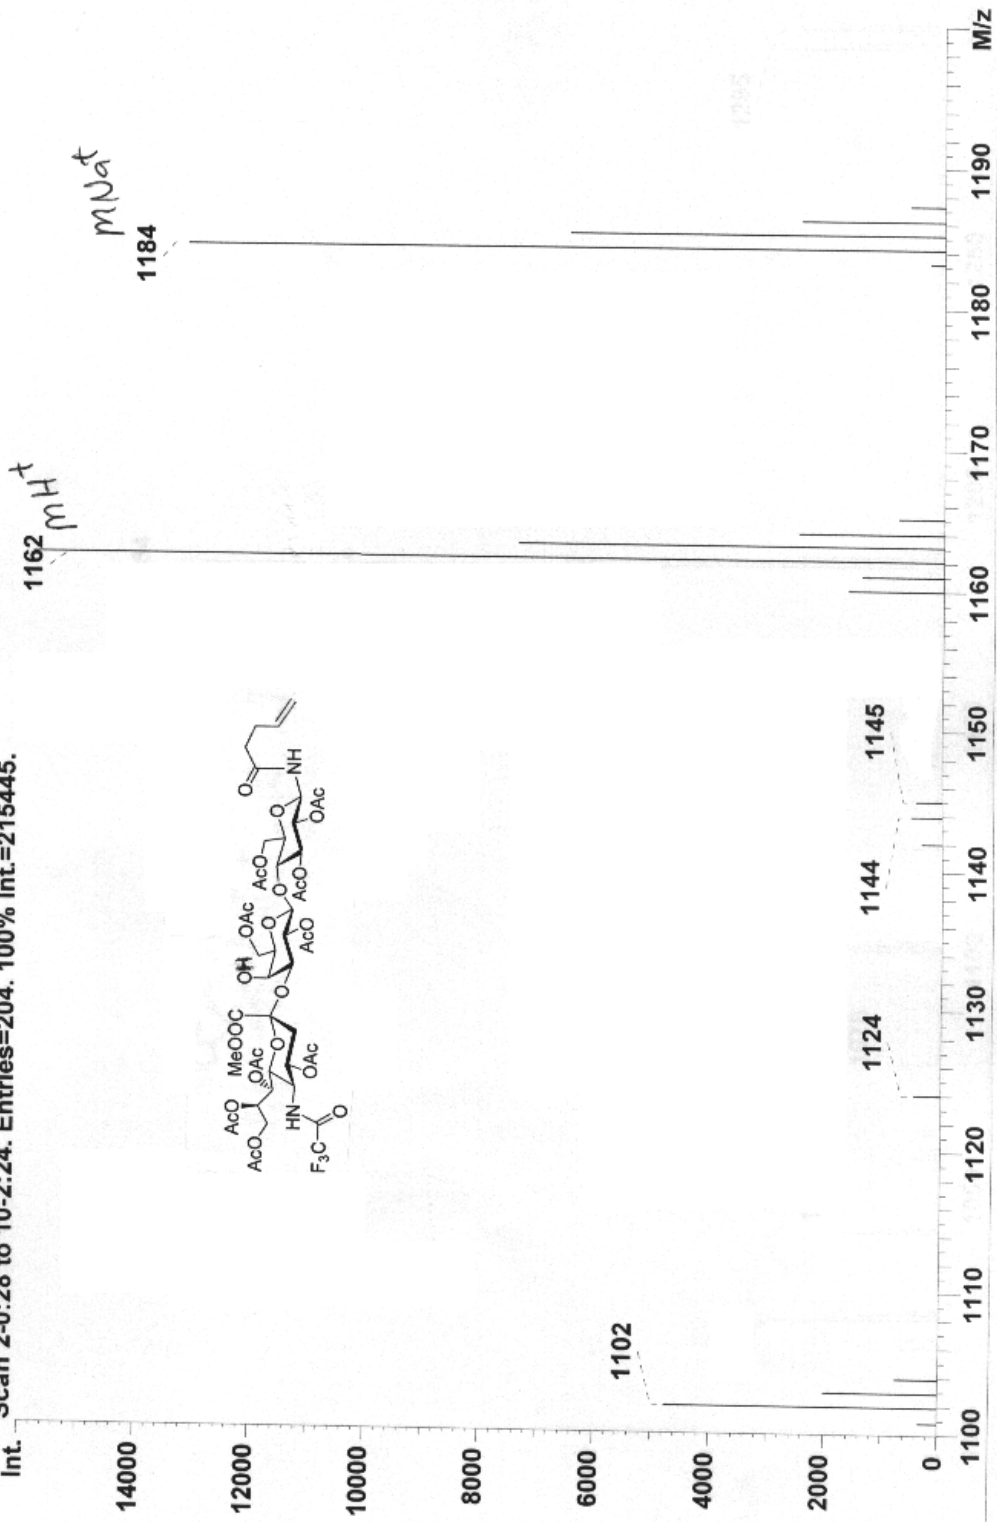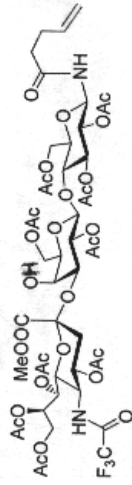

Compound 11a:

Archive directory: /support/home/guo/vnmrsys/data  
 Sample directory: AGRM3\_05NOV2002  
 File: PROTON

Pulse Sequence: s2pu1  
 Solvent: D2O  
 Temp.: 25.0 C / 298.1 K  
 INOVA-600 "Jarry"

Relax. delay 1.000 sec  
 Pulse 45.0 degrees  
 Acq. time 3.495 sec  
 Turn/200.7 Hz  
 32

OBSERVE F1 500.130796 MHz  
 DATA PROCESSING  
 FT size 65536  
 Total time 2 min, 24 sec

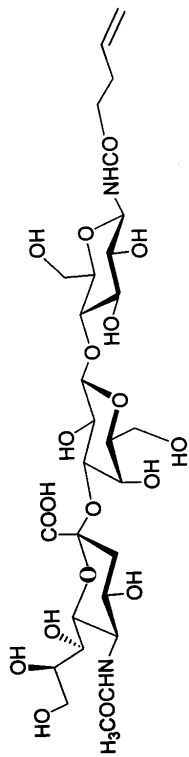

600MHz, D<sub>2</sub>O (4MeOH)

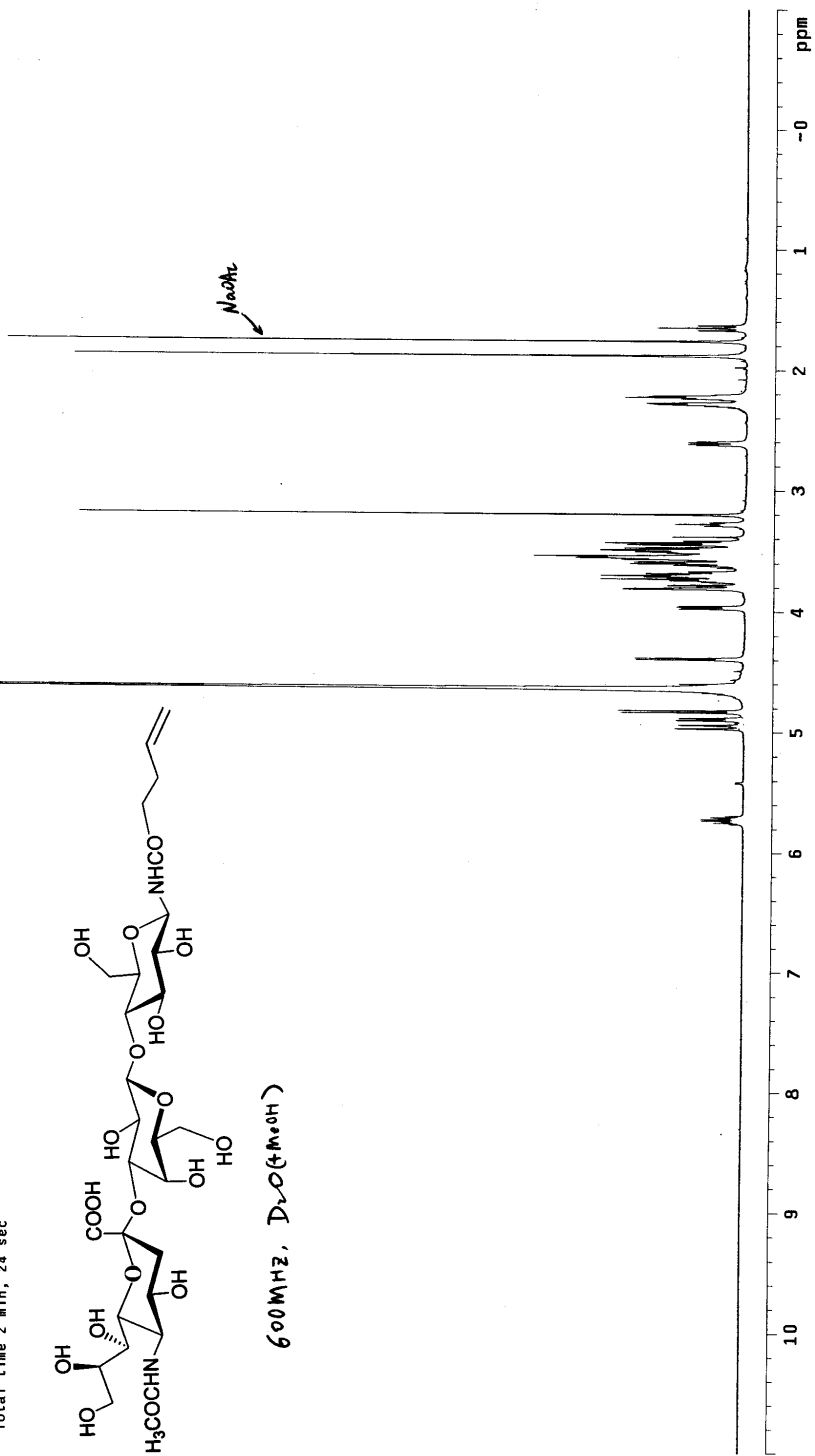

File Name : c:\mswin\data\pacgm302.mss  
Creation Date/Time : 12/5/02 at 15:34:37  
File Type : Lo-Res V/E Scan Data  
File Title : MR FAB v/e (1200) 12/5/02 YANBIN PAN  
Description 1 : 4ul sample (in 10ul MeOH) & 3ul DEA

SCAN GRAPH. Flagging=M/Z.  
Scan 1-0:05 to 9-0:46. Entries=26. 100% Int.=33529.

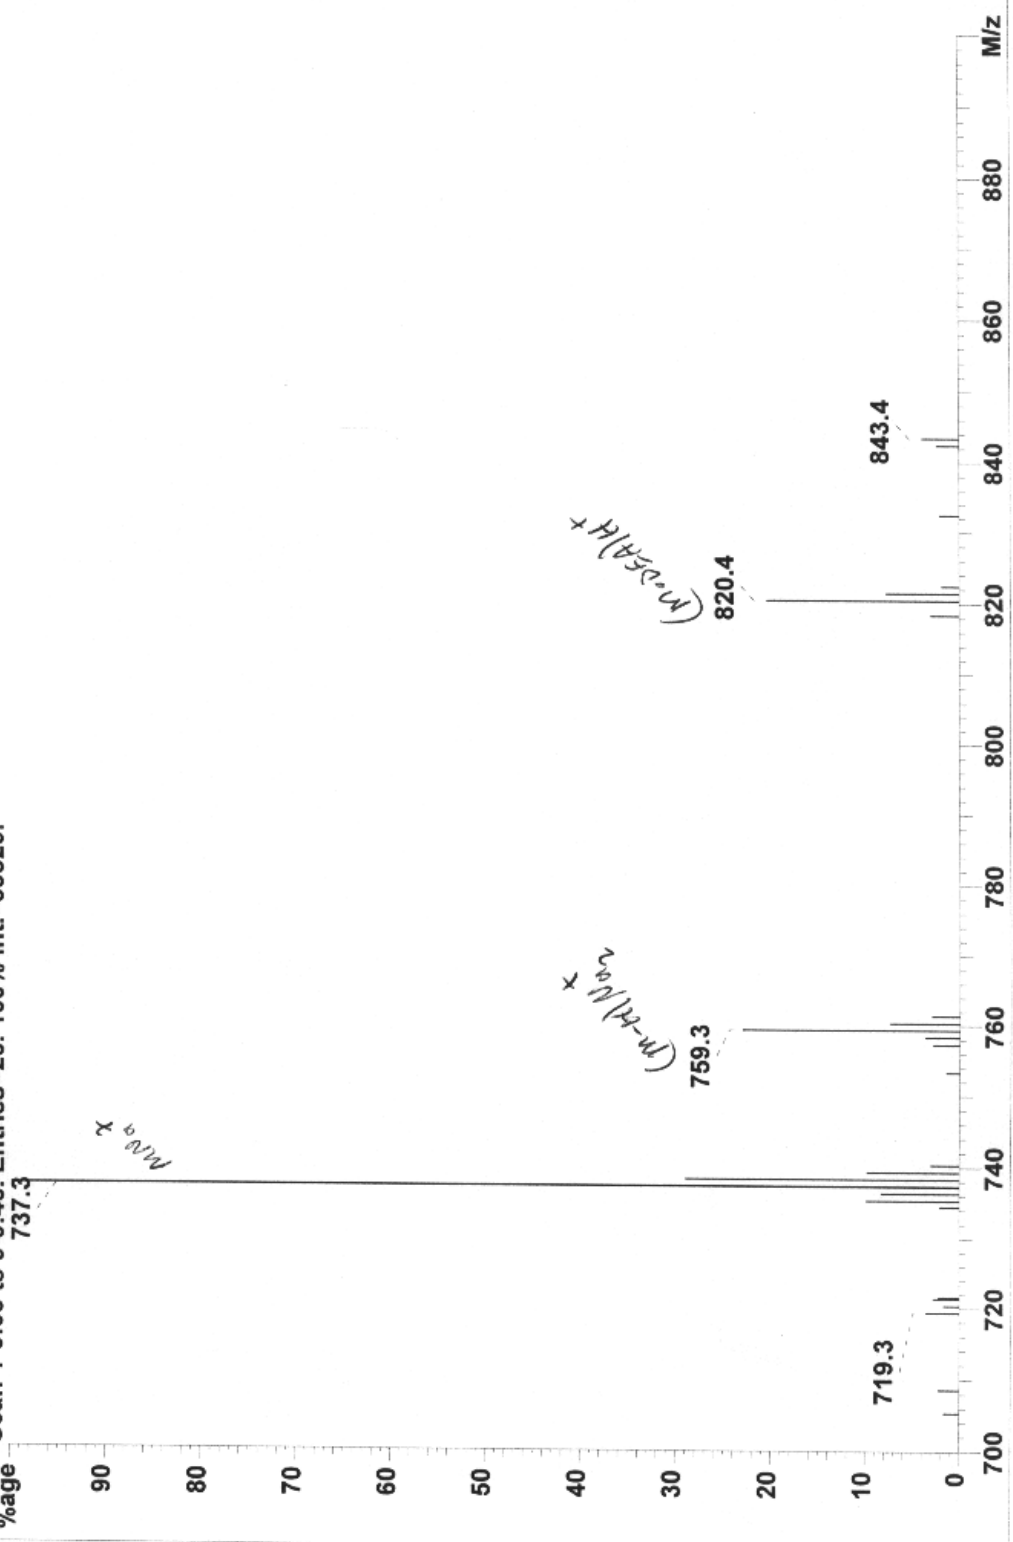

Compound 11b:

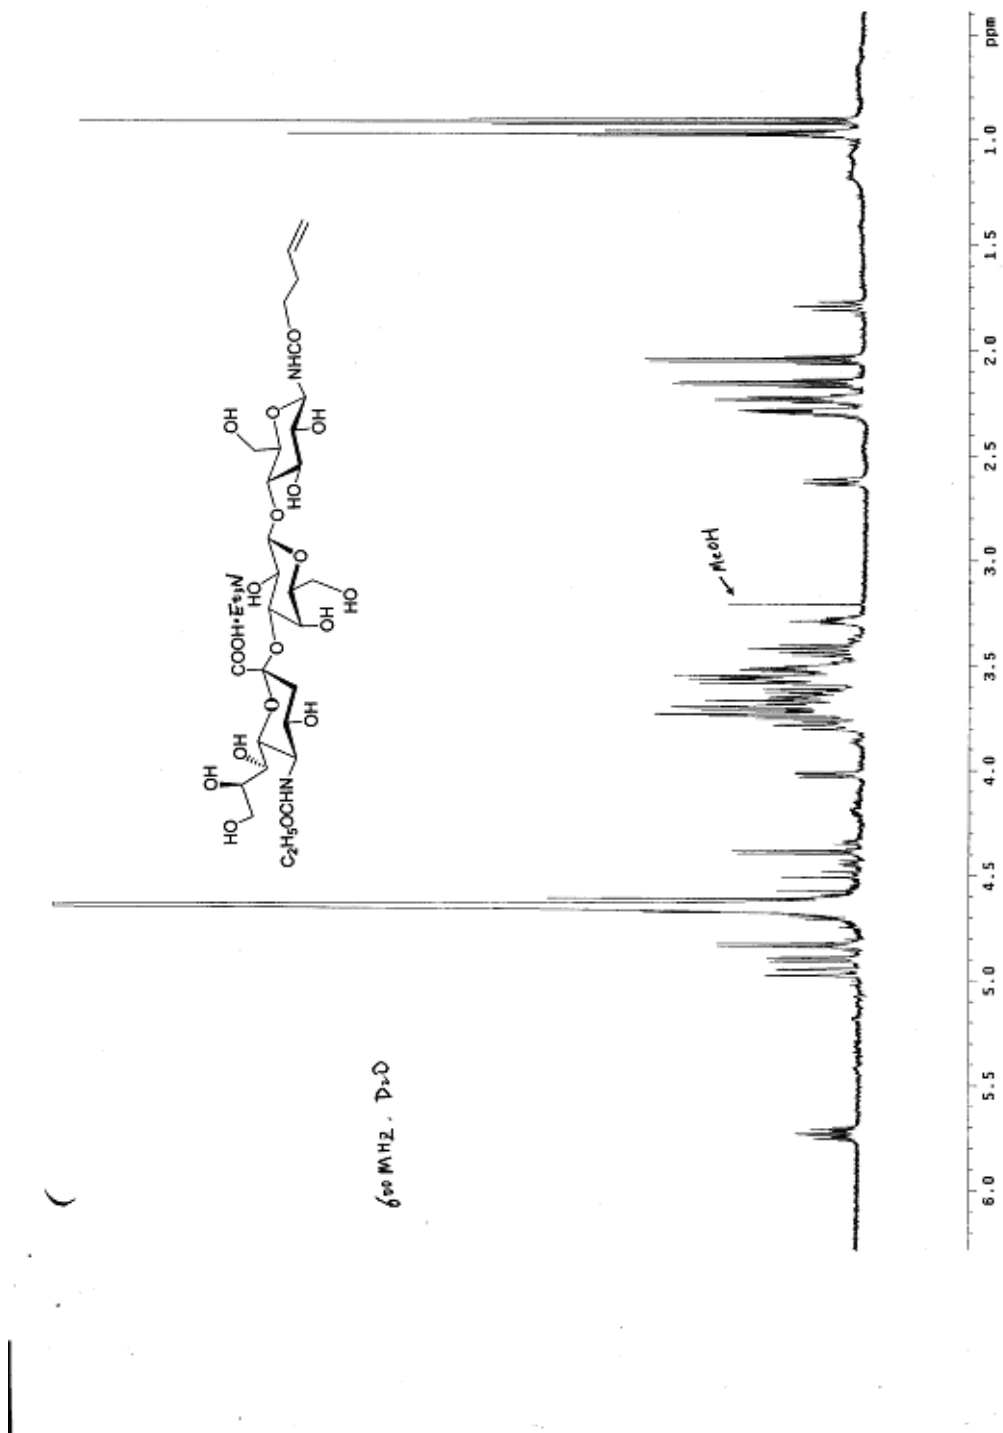

File Name : c:\mswin\data\pprgm301.mss  
Creation Date/Time : 12/5/02 at 14:00:02  
File Type : Lo-Res Mass Data (Centroid)  
File Title : PPrGM3 Yanbin Pan #1 LR FAB mag (1200) 12/5/02  
Description 1 : 3ul sample (in 10ul MeOH) & 3ul DEA

SCAN GRAPH. Flagging=M/z.

%age Scan 2-0:19 to 11-1:48. Entries=196. 100% Int.=10654.

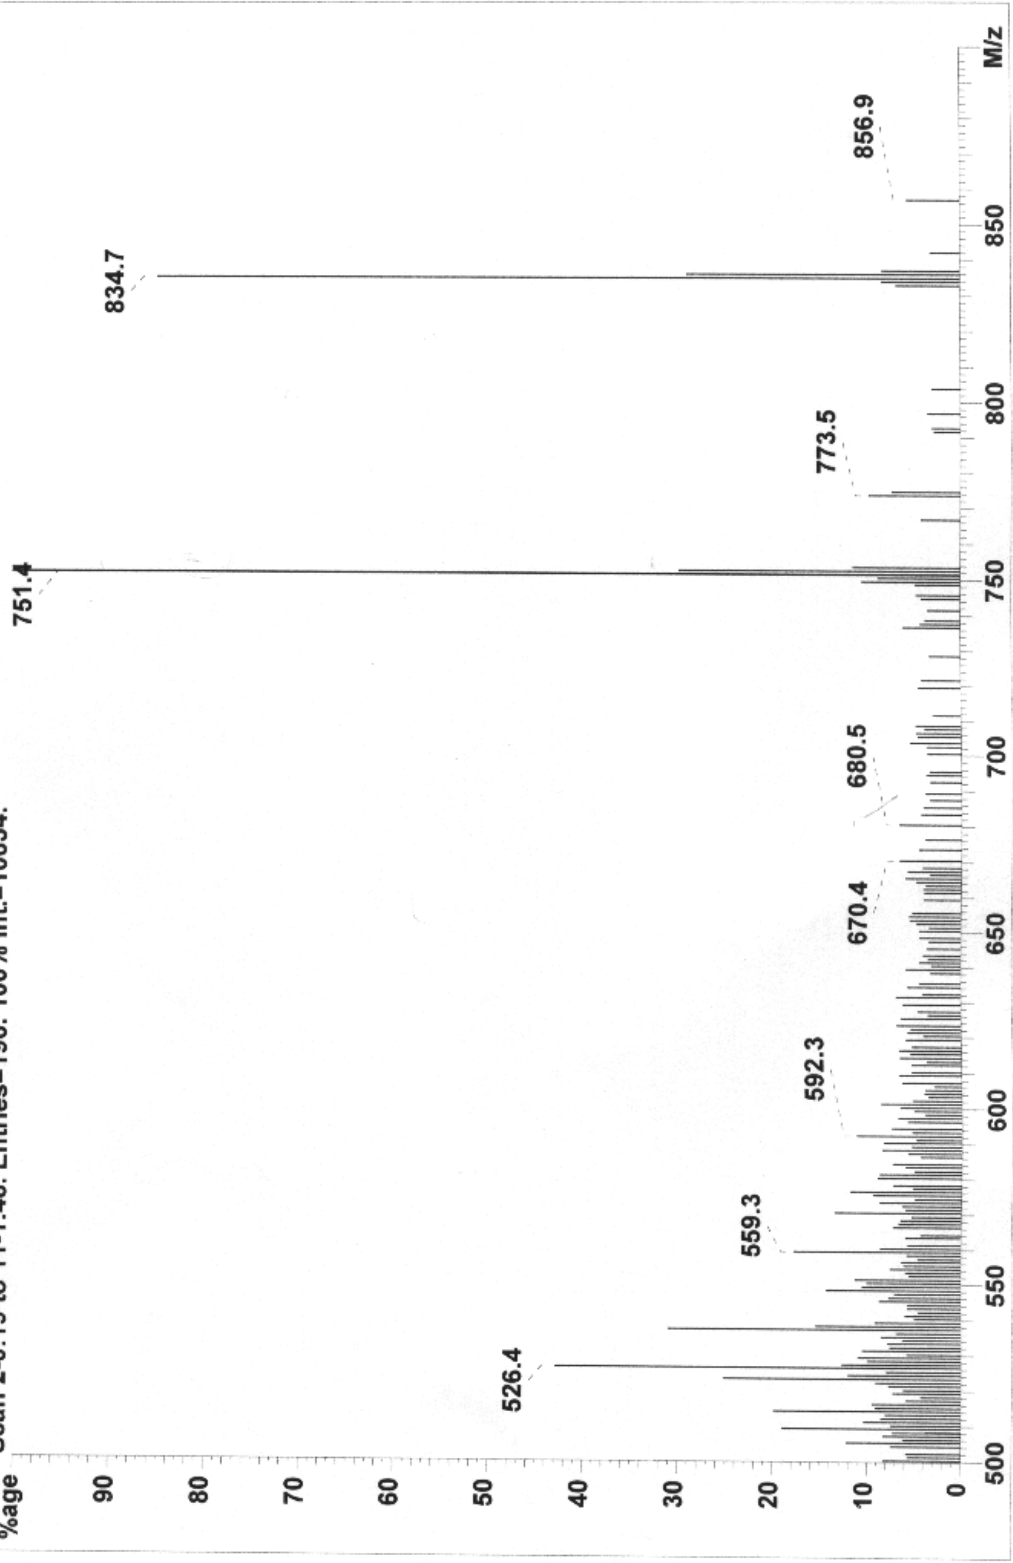



Compound 11c:

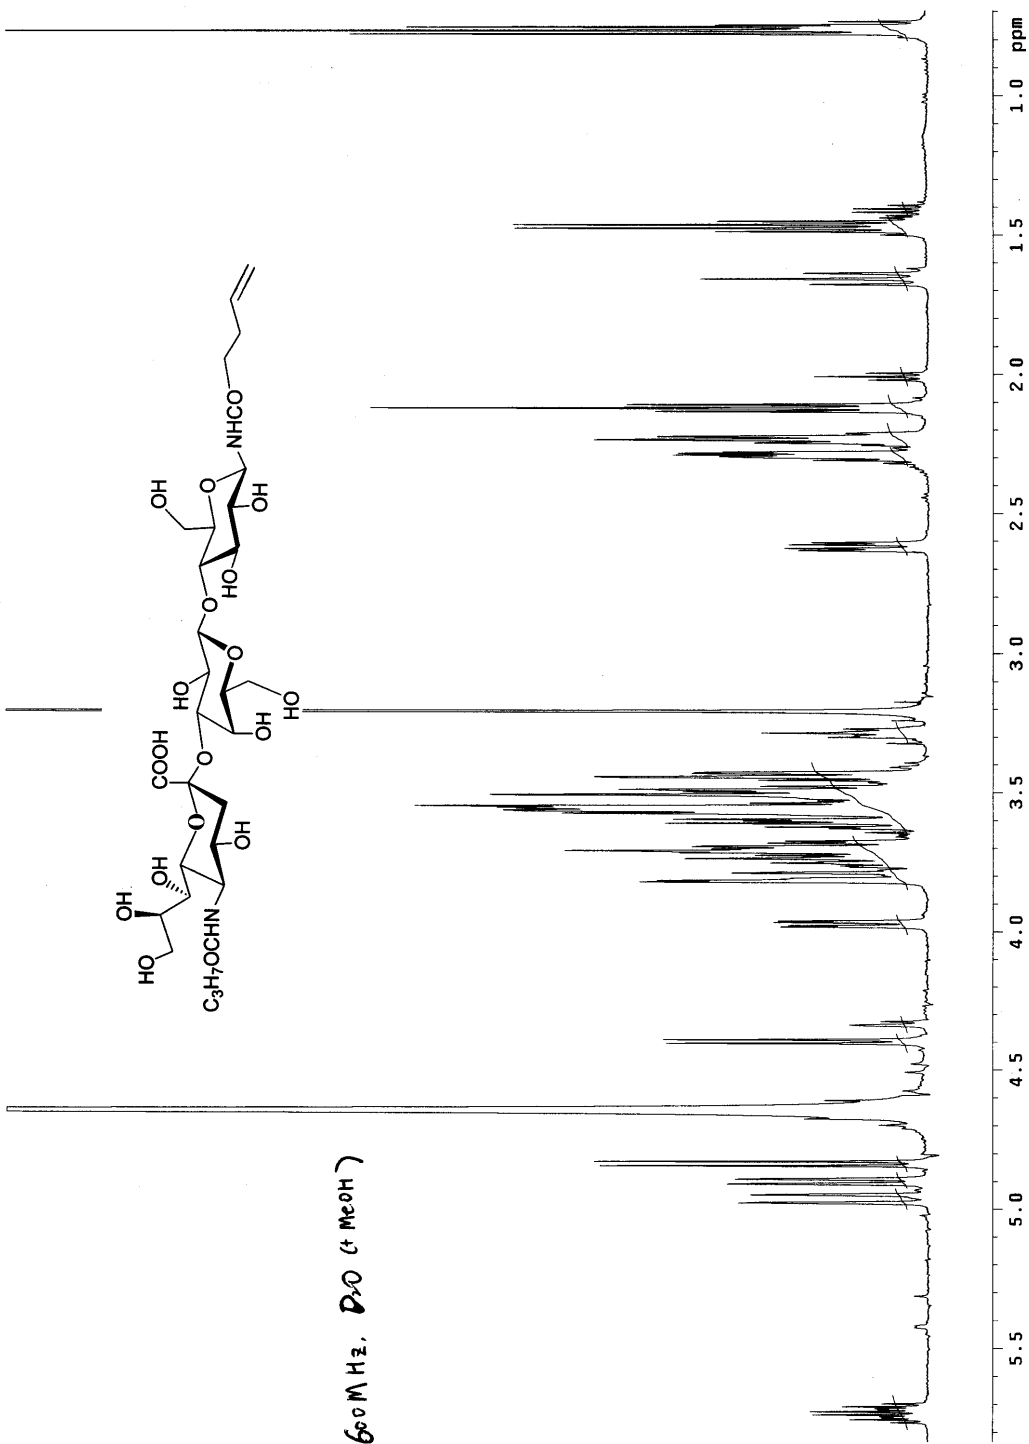

File Name : c:\mswin\data\inbugm302.mss  
 Creation Date/Time : 12/6/02 at 11:54:10  
 File Type : Hi-Res V/E Scan Data  
 File Title : MBuGM3 Yanbin Pan #2 HR FAB v/e 12/6/02  
 ESA calib range : 206-266 Da using CsI/NaI/Glycerol  
 ESA m/z range : 770-900 Da. Locked on 772.3164 Da of Stachyose-DEAH+  
 Matrix : 3ul DEA & 1ul Stachyose (52ug/ul water)

SCAN GRAPH. Flaggings=M/z.

Scan 1-0:03 to 6-0:20. Entries=14. 100% Int.=17559.

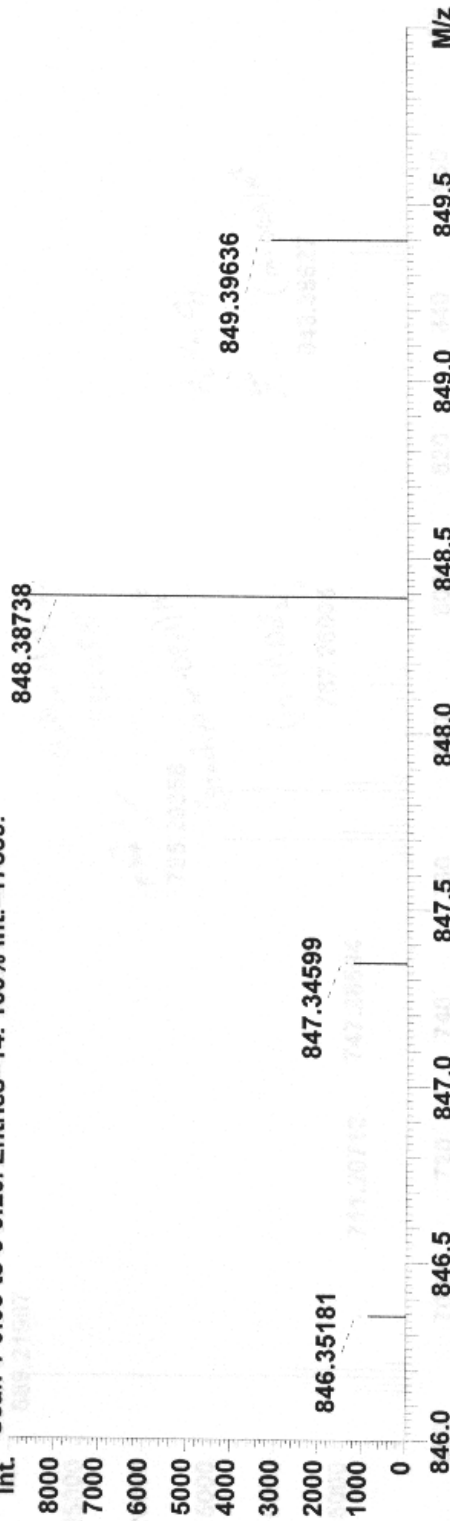

SCAN TEXT. Filter=[Range:846-850. Defect:0-0.5. Excl: Ref/Ex.].  
Scan 1-0:03 to 6-0:20. Sorted on M/z (ascending). Entries=4.

| M/z       | Int. | Width | Age   |
|-----------|------|-------|-------|
| 846.35181 | 846  | 14    | 4.82  |
| 847.34599 | 1210 | 17    | 6.89  |
| 848.38738 | 8569 | 22    | 48.80 |
| 849.39636 | 3083 | 18    | 17.56 |

Compound **11d**:

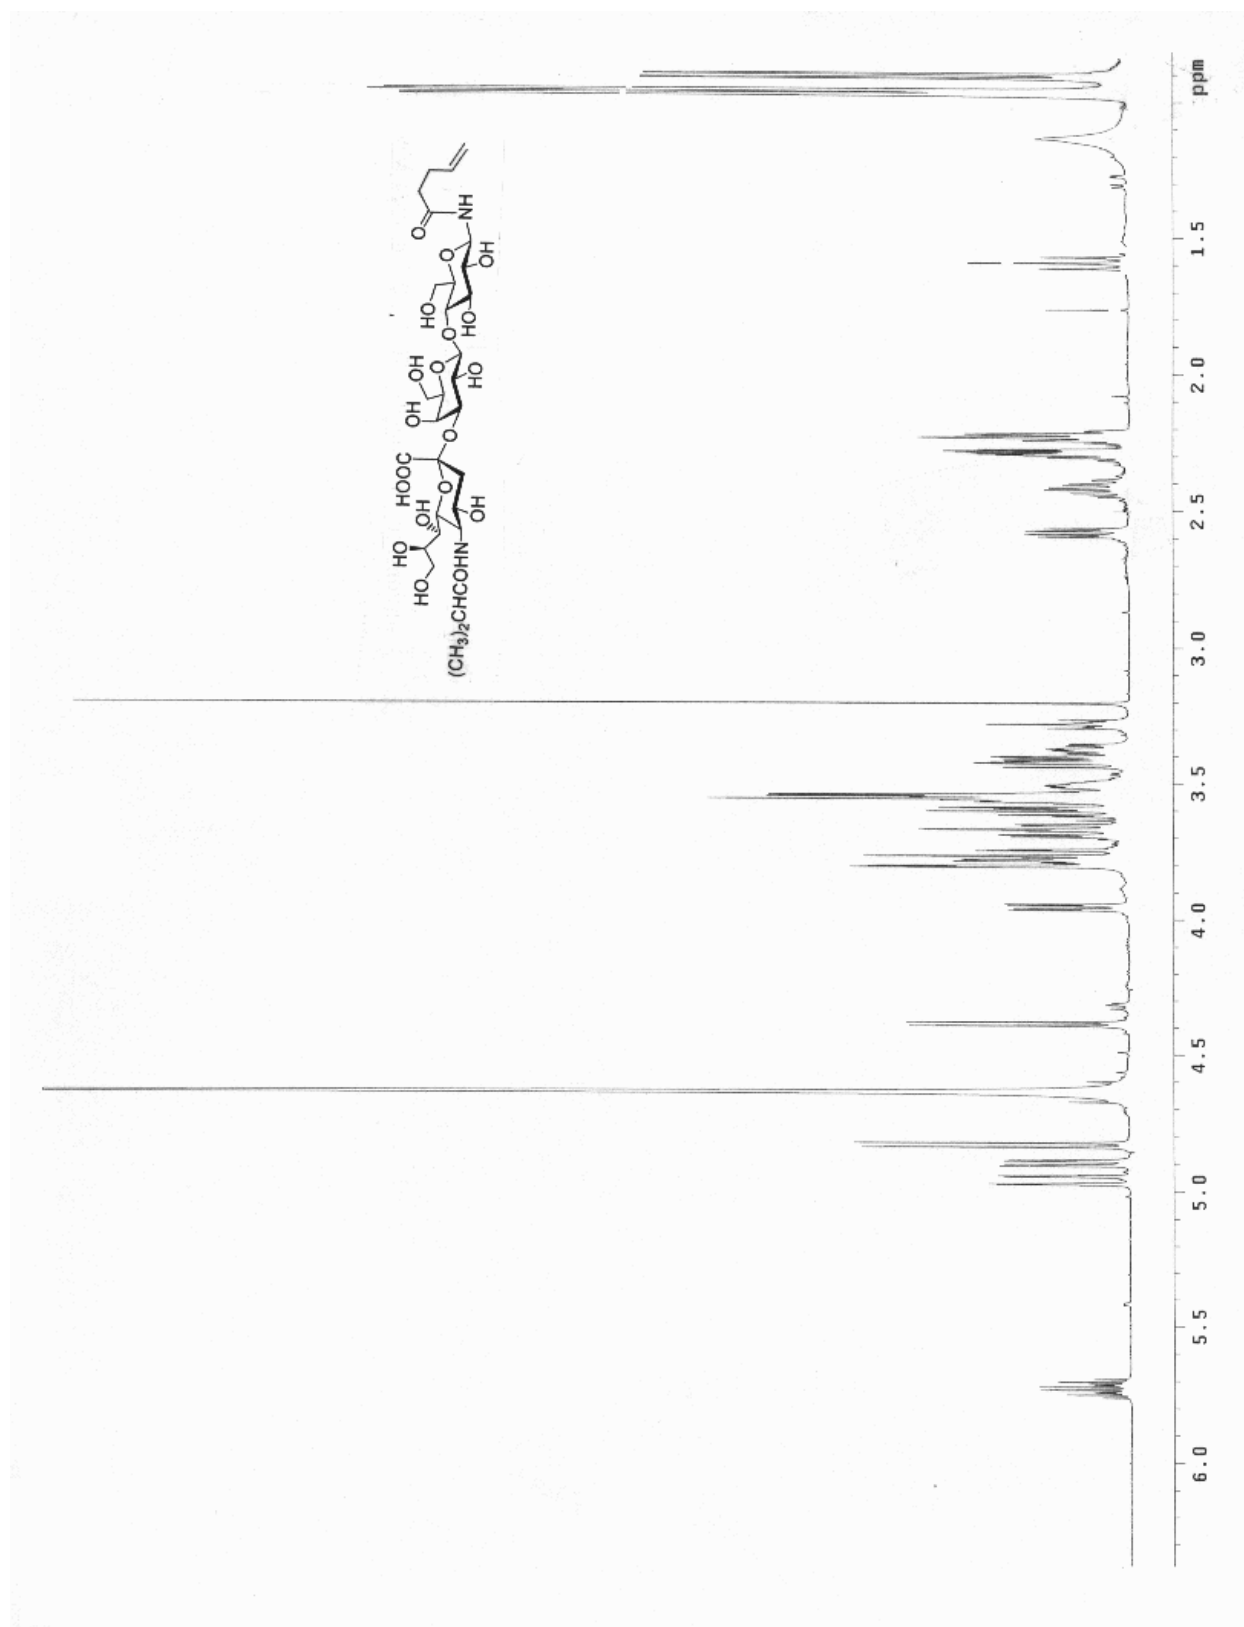

File Name. : c:\mswin\data\libugm02.mss  
 Creation Date/Time : 12/6/02 at 13:58:20  
 File Type : Hi-Res V/E Scan Data  
 File Title : IBuGM Yanbin Pan #2 HR FAB v/e 12/6/02  
 ESA calib range : 206-266 Da using CsI/NaI/Glycerol  
 ESA m/z range : 687-800 Da. Locked on 689.2197 Da of StachyoseNa+  
 Matrix : 3ul DEA & 2ul Stachyose (52ug/ul water)

SCAN GRAPH. Flagger=M/z. Filter=[Defect:0.25-0.32. Excl: Ref/Ex.].  
 Scan 1-0:03 to 4-0:13. Entries=33. 100% Int.=11657.

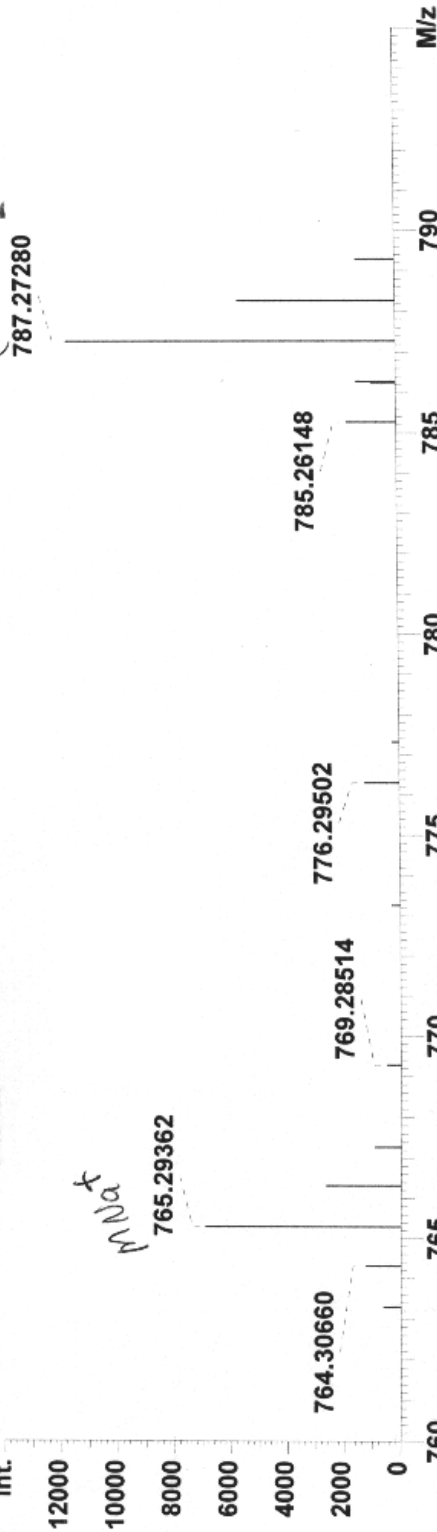

SCAN TEXT. Filter=[Range:760-795. Defect:0.25-0.32. Excl: Ref/Ex.].  
 Scan 1-0:03 to 4-0:13. Sorted on M/z (ascending). Entries=15.

| M/z       | Int.  | M/z | Width | %age |
|-----------|-------|-----|-------|------|
| 763.29212 | 622   | 770 | 15    | m    |
| 764.30660 | 1232  | 775 | 12    | m    |
| 765.29362 | 6920  | 780 | 26    | m    |
| 766.31066 | 2645  | 785 | 21    | m    |
| 767.27483 | 934   | 790 | 12    | m    |
| 769.28514 | 482   | 795 | 12    | m    |
| 773.26358 | 284   |     | 11    | m    |
| 776.29502 | 1208  |     | 20    | m    |
| 777.31408 | 241   |     | 10    | m    |
| 785.26148 | 1750  |     | 23    | m    |
| 786.25194 | 862   |     | 18    | m    |
| 787.27280 | 11657 |     | 18    | m    |
| 788.27489 | 5584  |     | 24    | m    |
| 789.28932 | 1369  |     | 22    | m    |

Compound 11e:

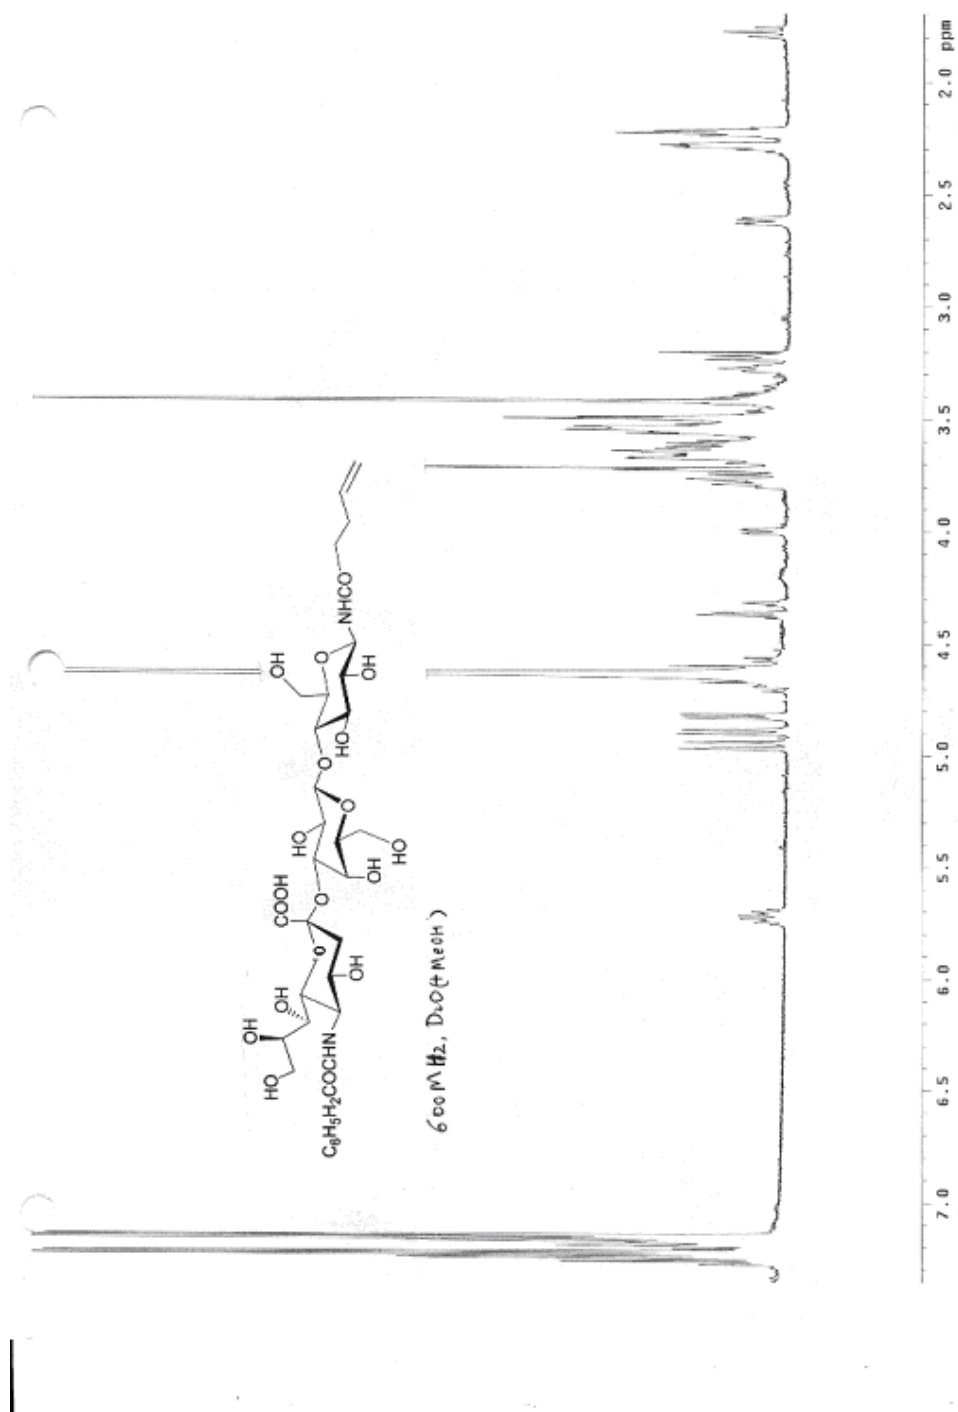

File Name : c:\mswin\data\phacgm02.mss  
 Creation Date/Time : 12/6/02 at 13:19:31  
 File Type : Hi-Res V/E Scan Data  
 File Title : PhAcGM Yanbin Pan #2 HR FAB v/e 12/6/02  
 ESA calib range : 206-266 Da using CsI/NaI/Glycerol  
 ESA m/z range : 770-920 Da. Locked on 772.3164 Da of (Stachyose-DEA)H+  
 Matrix : 3ul DEA & 4ul Stachyose (52ul/ug water)

SCAN GRAPH. Flagging=M/z.

Scan 31-1:55 to 39-2:25. Entries=38. 100% Int.=14322.

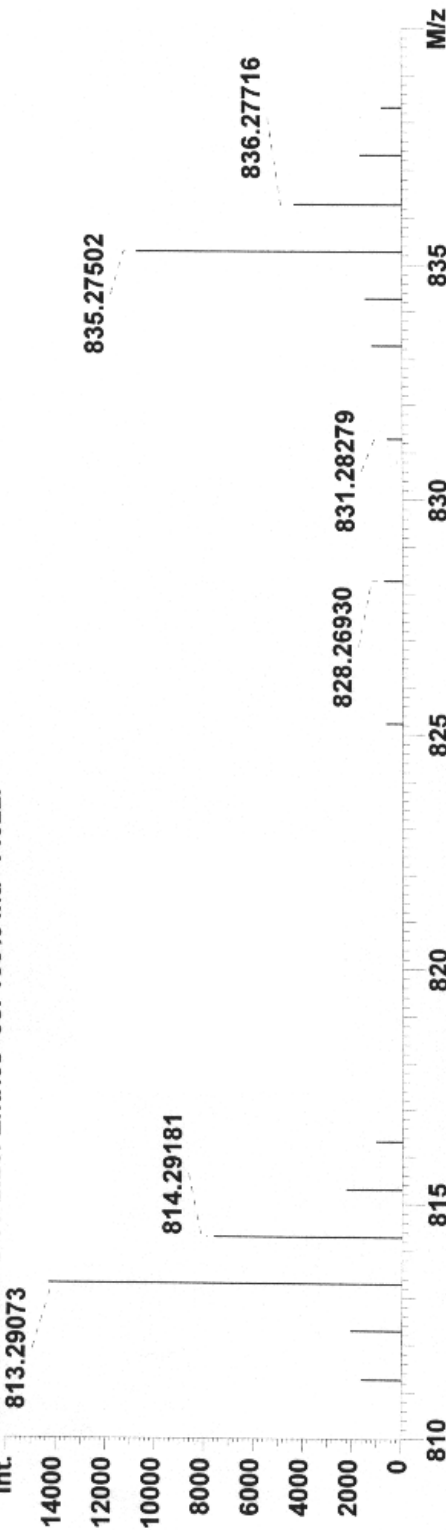

SCAN TEXT.Filter=[Range:810-840. Defect:0-0.5.]

Scan 31-1:55 to 39-2:25. Sorted on M/z (ascending). Entries=15.

| M/z       | Int.  | Width | Age    |
|-----------|-------|-------|--------|
| 811.26403 | 1608  | 17    | m      |
| 812.28529 | 2052  | 19    | 14.33  |
| 813.29073 | 14322 | 24    | 100.00 |
| 814.29181 | 7607  | 25    | 53.11  |
| 815.29580 | 2256  | 18    | m      |
| 816.31687 | 1062  | 17    | 7.42   |
| 825.22976 | 657   | 14    | m      |
| 828.26930 | 714   | 12    | m      |
| 831.28279 | 593   | 12    | m      |
| 833.25946 | 1228  | 17    | m      |
| 834.27296 | 1482  | 21    | 10.35  |
| 835.27502 | 10732 | 24    | 74.93  |
| 836.27716 | 4364  | 20    | m      |
| 837.30560 | 1681  | 16    | 11.74  |
| 838.31209 | 788   | 15    | m      |

File Name : c:\mswin\data\phacgm01.mss  
Creation Date/Time : 12/6/02 at 12:59:44  
File Type : Lo-Res Mass Data (Centroid)  
File Title : PhAcGM Yanbin Pan #1 LR FAB mag (1200) 12/6/02  
Description 1 : 3ul sample (in 20ul MeOH) & 3ul DEA

SCAN GRAPH. Flagging=M/z.  
Scan 2-0:16 to 6-0:50. Entries=669. 100% Int.=32826.

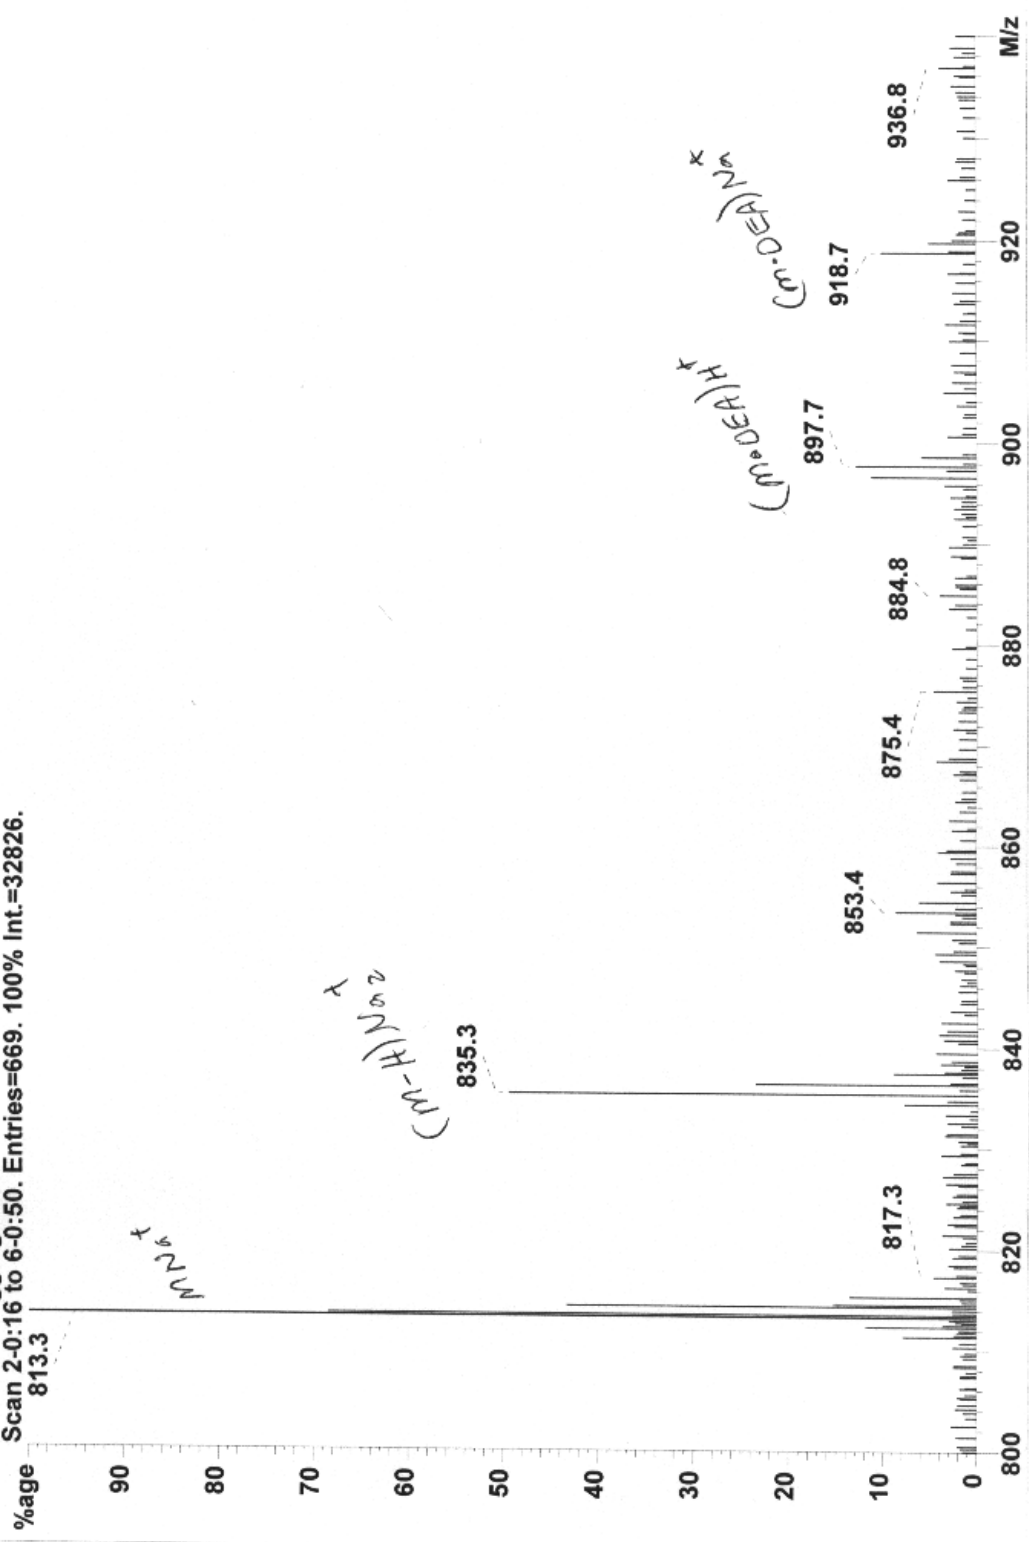

Supplement: NIHMS325279-supplement-SI.pdf [file NIHMS325279-supplement-SI.pdf]
